# Supplementary material for: Informatics Training for Pathology Practice and Research in the Digital Era
Source: PubMed Central journal article supplement — Acad Pathol. 2020 Mar 30;7:2374289520911179. doi: 10.1177/2374289520911179 (PMC7119238; doi:10.1177/2374289520911179), 2020-03-30
Supplement: APC-19-0101_Supplemental_Appendix_1.pdf [file APC-19-0101_Supplemental_Appendix_1.pdf]

## Supplemental Appendix 1: Semi-structured Interview Guide

These questions to follow the survey instrument on the course design and their experiences.

Introduction statement: Thank you for taking the time to answer these follow-up questions about your experiences with informatics during the Informatics for Pathology Practice and Research course series and afterwards. If at any time you are unsure about what I am asking about, please stop me and ask for clarification. You do not have to answer any question that you do not wish to answer. However, full, detailed responses are most valuable to this study on educational improvements. We will record this conversation and make a transcript from it but will keep your responses confidential and secure (on the UF protected network drives) and we'll delete the recording at the conclusion of the research study. Thus, neither your name nor voice will be used in any report. Are you ready to begin or would you like to ask a question before we get started? Could you please provide a pseudonym that I can use when reporting on your responses in this research study?

1. Now that you've taken IPPR, how would you describe your level of preparedness for using informatics in your career?
  - a. What course experiences prepared you the best? Which course experiences did you value most?
  - b. What prevented you from being more prepared?
2. Since completing the IPPR, have you been able to apply what you learned in IPPR?
  - a. Do you have any specific examples? (Research, Communication with Informatics teams/collaborators, Leading Informatics Efforts)
3. Has the IPPR series had any impact on your future career path? (applying to a Clinical Informatics Fellowship or seeking Informatics Medical subspecialty board certification)
4. [If applicable] Most people were more satisfied with IPPR 1 & 3 than 2. Why do you think that is?
  - a. Can you think of a specific moment in IPPR 2 that would have benefitted from a lecture instead of a YouTube video?
5. If you could do it again, would you sign-up for the IPPR course series?
6. Feeling like you don't have sufficient time to learn programming is a big challenge for many participants, which the instructor knew about ahead of time. For 3 credits in a 15 week semester (or in this case 1 credit in 5 weeks), the typical course expectation is that students spend 3 hours being instructed and 6 hours outside of class, studying and doing homework. Does that model seem representative of how you spent your time each week?
  - a. Can you be more specific on how much time you spent on different tasks associated with IPPR?
  - b. Can you describe a more ideal class-time and homework/studying course design?
  - c. Where you studying with anyone else during this course?
7. [If applicable] What prevented you from being more successful in completing the IPPR series?
8. Is there anything else that you would like to add?
  - a. Is there any other topic that you think should be addressed in this area?
