# Supplementary material for: Informatics Training for Pathology Practice and Research in the Digital Era
Source: PubMed Central journal article supplement — Acad Pathol. 2020 Mar 30;7:2374289520911179. doi: 10.1177/2374289520911179 (PMC7119238; doi:10.1177/2374289520911179), 2020-03-30
Supplement: APC-19-0101_Supplemental_Table_1.pdf [file APC-19-0101_Supplemental_Table_1.pdf]

**Supplemental Table 1.** IPPR Course Purpose and Objectives

| <b>Course Name</b>                                  | <b>Course Purpose</b>                                                                                                                                                                                                | <b>Objectives</b>                                                                                                                                                                                                                                                                                                                                                                                                      |
|-----------------------------------------------------|----------------------------------------------------------------------------------------------------------------------------------------------------------------------------------------------------------------------|------------------------------------------------------------------------------------------------------------------------------------------------------------------------------------------------------------------------------------------------------------------------------------------------------------------------------------------------------------------------------------------------------------------------|
| <i>IPPR – Unix Operating System</i>                 | Provided an overview of critical commands and solutions for working on Unix or Unix-like operating systems (OS) e.g., Linux                                                                                          | <ol style="list-style-type: none"><li>1. Navigate through Unix/Linux environments</li><li>2. Solve big data science problems by using high performance computing servers</li><li>3. Create programs, and interpret those written by others, in Unix</li><li>4. Make informed decisions on informatics server needs in a biomedical setting</li></ol>                                                                   |
| <i>IPPR – Python Programming</i>                    | Provided an overview of essential concepts of software programming using the Python programming language                                                                                                             | <ol style="list-style-type: none"><li>1. Think computationally about problem-solving (formulating a problem and expressing its solution for a computer to process)</li><li>2. Discuss software programming concepts</li><li>3. Create high quality programs in Python</li><li>4. Interpret Python programs written by others</li><li>5. Make informed decisions on programming needs in a biomedical setting</li></ol> |
| <i>IPPR – Big Data Analysis &amp; Visualization</i> | Building upon the concepts learned in IPPR Python Programming, this course covered advanced data analysis and visualization concepts using popular data science programming python libraries, Pandas and Matplotlib. | <ol style="list-style-type: none"><li>1. Efficiently extract relevant information from Big Data sets for data exploration using Python</li><li>2. Efficiently extract relevant information from Big Data sets for data exploration using Pandas</li><li>3. Create data visualizations in Python</li></ol>                                                                                                              |
