# Supplementary material for: Informatics Training for Pathology Practice and Research in the Digital Era
Source: PubMed Central journal article supplement — Acad Pathol. 2020 Mar 30;7:2374289520911179. doi: 10.1177/2374289520911179 (PMC7119238; doi:10.1177/2374289520911179), 2020-03-30
Supplement: APC-19-0101_Supplemental_Table_2.pdf [file APC-19-0101_Supplemental_Table_2.pdf]

**Supplemental Table 2.** Informatics for Pathology Practice and Research 1 Course Architecture.

| Module # | Module Objectives                                                                           | Assessment                 | Course Objective # |
|----------|---------------------------------------------------------------------------------------------|----------------------------|--------------------|
| 1        | Build a basic Unix environment                                                              | Exercises                  | 1,3                |
| 1        | Apply Unix commands for navigating through file systems                                     | Pre-Class Quiz*, Exercises | 1,3                |
| 2        | Apply and create Unix commands for examining, modifying, and renaming files and directories | Pre-Class Quiz*, Exercises | 1,3                |
| 3        | Apply and create Unix commands for searching, copying, comparing, and joining files/folders | Pre-Class Quiz*, Exercises | 1,3                |
| 3        | Apply and create Unix commands for process management and software installation             | Pre-Class Quiz*, Exercises | 3,4                |
| 4        | Create new documents and scripts using nano editor                                          | Pre-Class Quiz*, Exercises | 3                  |
| 4        | Create shell scripts using AWK, sed, and Unix commands                                      | Pre-Class Quiz*, Exercises | 3                  |
| 4        | Conduct ad hoc data processing with command creation                                        | Exercises                  | 3                  |
| 5        | Write and read bash scripts                                                                 | Pre-Class Quiz*, Exercises | 3                  |
| 5        | Submit and manage jobs via Slurm on HiPerGator                                              | Pre-Class Quiz*, Exercises | 2,3,4              |
| 1-5      | Evaluate Unix commands for effectiveness and efficiency                                     | Peer Review                | 1,3,4              |

\*Pre-class Quizzes were used as assessment scaffolding to check knowledge and comprehension of commands prior to higher-order Exercises.
