# Supplementary material for: Informatics Training for Pathology Practice and Research in the Digital Era
Source: PubMed Central journal article supplement — Acad Pathol. 2020 Mar 30;7:2374289520911179. doi: 10.1177/2374289520911179 (PMC7119238; doi:10.1177/2374289520911179), 2020-03-30
Supplement: APC-19-0101_Supplemental_Table_3.pdf [file APC-19-0101_Supplemental_Table_3.pdf]

**Supplemental Table 3.** Informatics for Pathology Practice and Research 2 Course Architecture.

| Module # | Module Objectives                                                                                                 | Assessment                 | Course Objective # |
|----------|-------------------------------------------------------------------------------------------------------------------|----------------------------|--------------------|
| 1        | Recognize basic concepts behind computer programming in the context of Python                                     | Pre-Class Quiz             | 1,2,4,5            |
| 1        | Create a basic Python program in a Jupyter console                                                                | Pre-Class Quiz*, Exercises | 1,2,3,5            |
| 2        | Create and utilize data structures for storing, modifying and performing valid operations on stored data          | Pre-Class Quiz*, Exercises | 1,2,3,5            |
| 3        | Apply and create conditional statements and iteration loops                                                       | Pre-Class Quiz*, Exercises | 1,2,3,5            |
| 4        | Read and write from files using python programming                                                                | Pre-Class Quiz*, Exercises | 1,2,3,4,5          |
| 4        | Perform common operations on files                                                                                | Pre-Class Quiz*, Exercises | 1,2,3              |
| 4        | Resolve except statements that may occur in a python program                                                      | Pre-Class Quiz*, Exercises | 1,2,3,4            |
| 5        | Create programs to automate manual steps                                                                          | Pre-Class Quiz*, Exercises | 1,2,3,5            |
| 5        | Solve a large problem through dissection into smaller programming components that integrate together as a project | Pre-Class Quiz*, Exercises | 1,2,3,5            |
| 1-5      | Evaluate Python programming for effectiveness and efficiency                                                      | Peer Review                | 1,2,4,5            |

\*Pre-class Quizzes were used as assessment scaffolding to check knowledge and comprehension of commands prior to higher-order Exercises.
