# Supplementary material for: Informatics Training for Pathology Practice and Research in the Digital Era
Source: PubMed Central journal article supplement — Acad Pathol. 2020 Mar 30;7:2374289520911179. doi: 10.1177/2374289520911179 (PMC7119238; doi:10.1177/2374289520911179), 2020-03-30
Supplement: APC-19-0101_Supplemental_Table_4.pdf [file APC-19-0101_Supplemental_Table_4.pdf]

**Supplemental Table 4.** Informatics for Pathology Practice and Research 3 Course Architecture.

| Module # | Module Objectives                                                                                 | Assessment                 | Course Objective # |
|----------|---------------------------------------------------------------------------------------------------|----------------------------|--------------------|
| 1        | Navigate Big Datasets                                                                             | Exercises                  | 1,2                |
| 1        | Retrieve detailed explanations of data in files                                                   | Exercises                  | 1,2                |
| 1        | Navigate the Pandas Library                                                                       | Pre-Class Quiz, Exercises  | 2                  |
| 2        | Apply filters to Data frames and mine useful data                                                 | Pre-Class Quiz*, Exercises | 2                  |
| 2        | Analyze data by plotting related values from Data Sets                                            | Pre-Class Quiz*, Exercises | 1,2,3              |
| 2        | Navigate Data frames using Indexes                                                                | Pre-Class Quiz*, Exercises | 2                  |
| 3        | Manage columns and rows within a Data frame                                                       | Pre-Class Quiz*, Exercises | 2                  |
| 3        | Experiment with string functions and apply them to the Data                                       | Pre-Class Quiz*, Exercises | 1,2                |
| 3        | Arrange time series data using pandas time functions to extract required information              | Pre-Class Quiz*, Exercises | 1,2                |
| 3        | Edit raw Data Sets to address missing data problems                                               | Exercises                  | 1,2,3,4            |
| 4        | Organize and classify data based on group                                                         | Pre-Class Quiz, Exercises  | 1,2,3              |
| 4        | Apply user defined functions to the data frame                                                    | Pre-Class Quiz*, Exercises | 2                  |
| 4        | Express regular function in the form of Lambda expression                                         | Pre-Class Quiz*, Exercises | 1                  |
| 5        | Rearrange data according to the needs of the analysis                                             | Exercises                  | 1,2                |
| 5        | Extract parts of data for better understanding of patterns                                        | Exercises                  | 1,2,3,4            |
| 5        | Construct new tables from the old tables to correlate separate data                               | Exercises                  | 3,4                |
| 1-5      | Evaluate Python and Panda use for efficient extraction of relevant information in large data sets | Peer Review                | 5                  |
| 1-5      | Evaluate Python and Panda use for effective visualization of key information in large data sets   | Peer Review                | 5                  |

\*Pre-class Quizzes were used as assessment scaffolding to check knowledge and comprehension of commands prior to higher-order Exercises.
